# Supplementary material for: One-dimensional assembly of β-form anhydrous guanine microrods
Source: Royal Society of Chemistry journal article supplement (doi:10.1039/d0sm01717e), 2020-12-21
Supplement: d0sm01717e1.pdf [file d0sm01717e1.pdf]

## Supplementary information

### One-dimensional assembly of $\beta$ -form anhydrous guanine microrods

Yanan Liu,<sup>a</sup> Fenghua Chen<sup>a, b</sup>, Dongmei Guo<sup>a</sup> and Yurong Ma<sup>\*a</sup>

---

<sup>a</sup>MOE Key laboratory of Cluster Science, School of Chemistry and Chemical Engineering, Beijing Institute of Technology, Beijing 100081, China. E-mail: yurong.ma@bit.edu.cn

<sup>b</sup>School of Resources and Chemical Engineering, Sanming University, Jingdong Road 25, Sanming, 365004, China

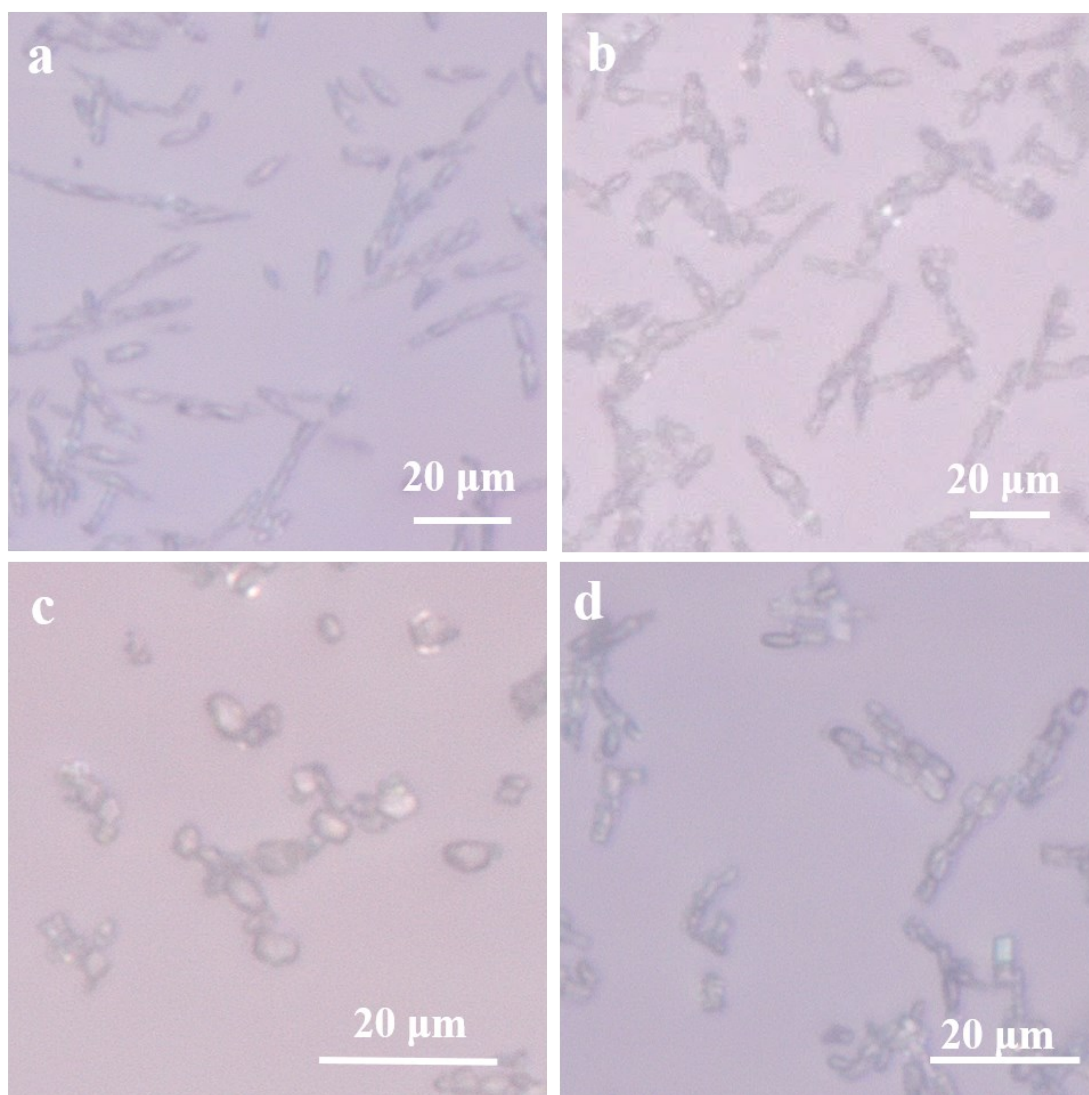

Fig. S1 The optical microscope images of the 1D assembly of guanine microrods formed in four systems. (a) Standard system. (b) Py system. (c) NVP system, and (d) NMP system.

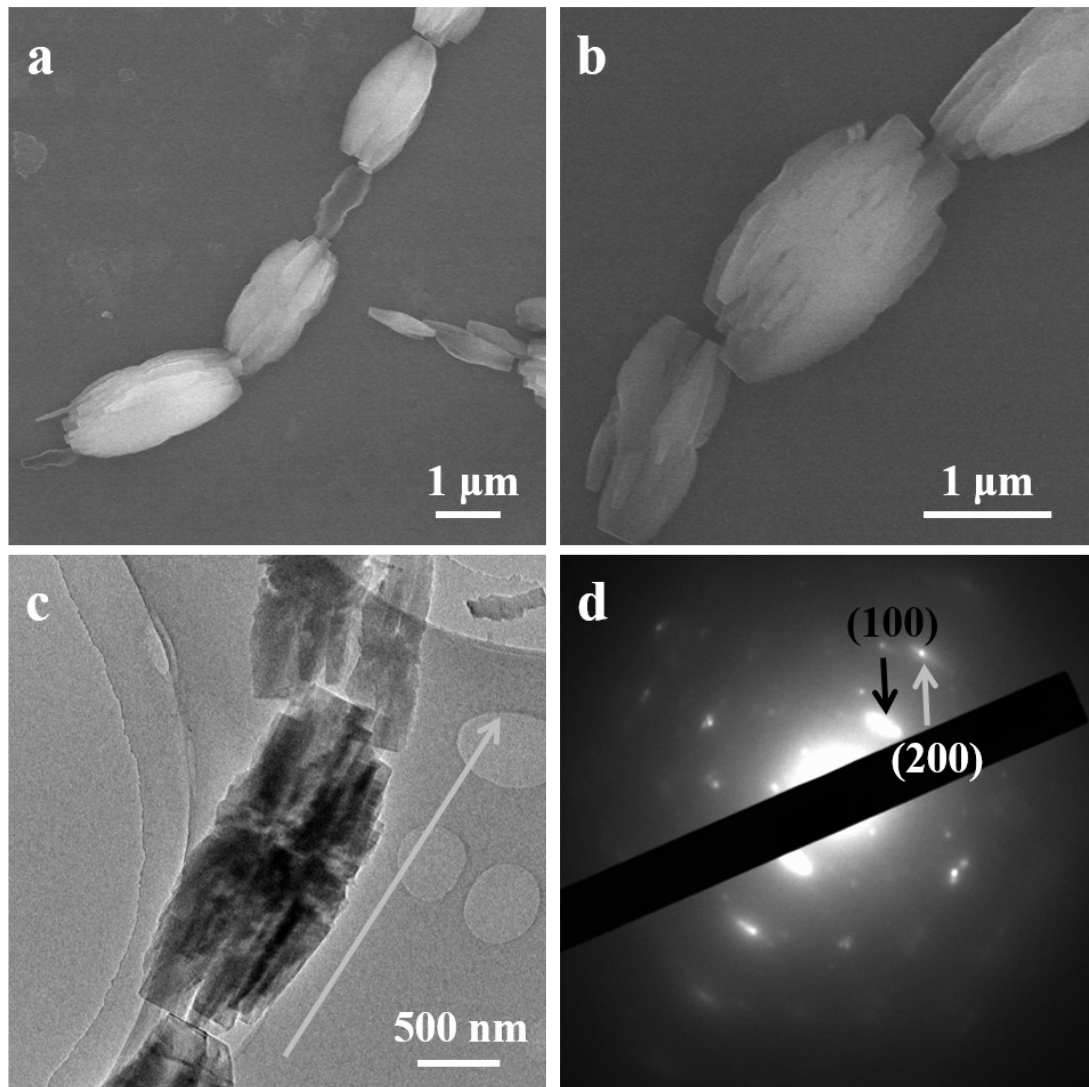

Fig. S2 Characterizations of  $\beta$ -AG microrods formed in standard system. (a, b) SEM, (c) TEM images. (d) SAED pattern of one guanine microrod shown in (c). The point pointed by the black arrow represents the (100) plane.

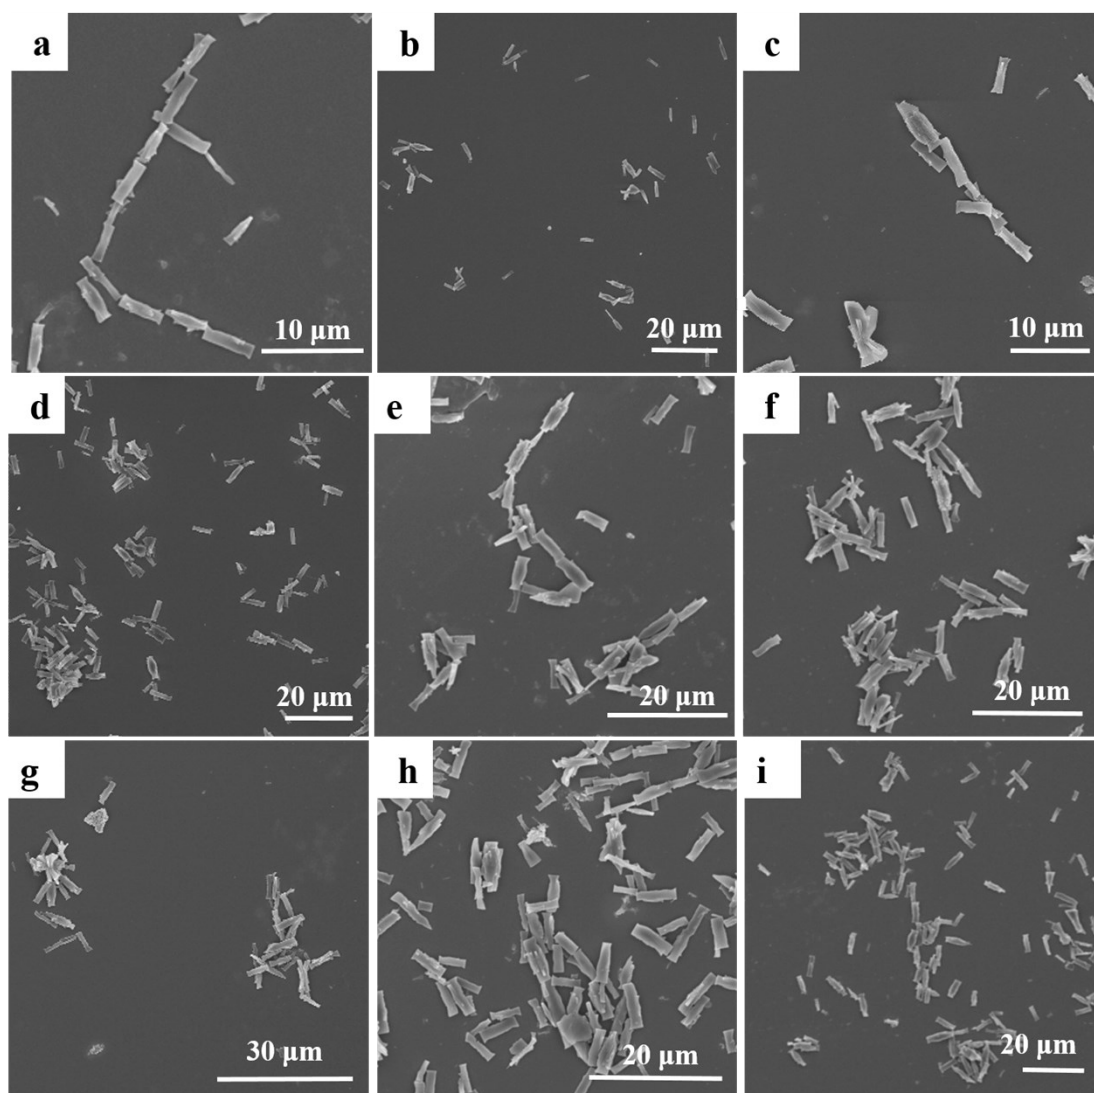

Fig. S3 Reversible and irreversible process of the 1D guanine assemblies of  $\beta$ -AG microrods formed in Py system by using SEM. (a-c) Reversible assembly of  $\beta$ -AG microrods in water and acetone. (a) 1D assembly forms in water. (b) 1D structures of  $\beta$ -AG microrods disassembly in acetone. (c) Reversible 1D assembly can be observed in water again after being treated in acetone. (a, d, e) Similar reversible process in water and isopropanol. (a, f, g) Irreversible assembly of  $\beta$ -AG microrods in water and dichloroethane. (f) 1D structures of  $\beta$ -AG microrods disassembly in dichloroethane. (g) No 1D assembly can be observed in water again after being treated in dichloroethane. (a, h, i) Similar irreversible process in water and petroleum ether.

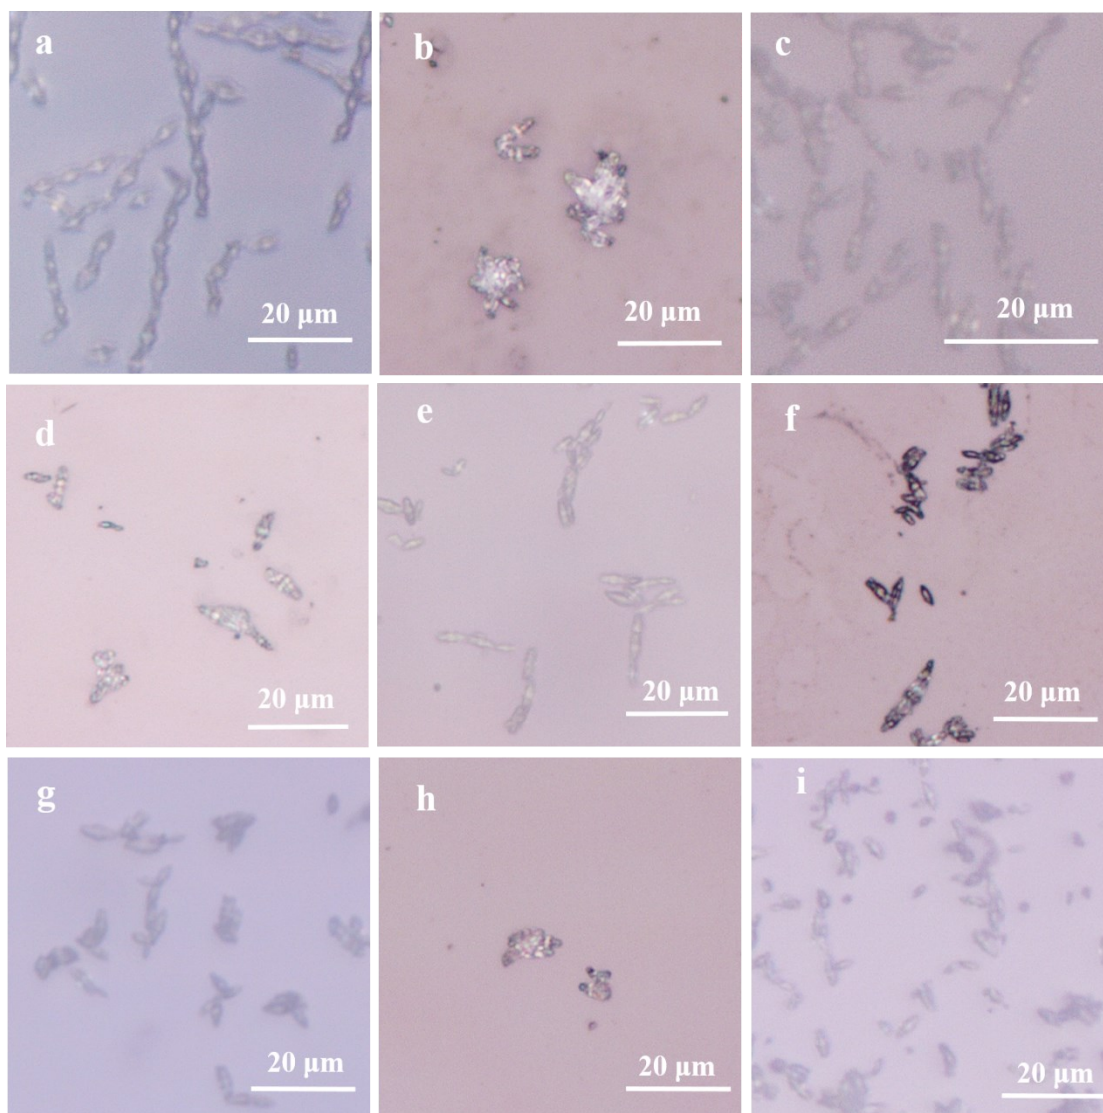

Fig. S4 Reversible and irreversible process of the 1D guanine assemblies of  $\beta$ -AG microrods formed in Py system by using LM. (a-c) Reversible assembly of  $\beta$ -AG microrods in water and acetone. (a) 1D assembly forms in water. (b) 1D structures of  $\beta$ -AG microrods disassembly in acetone. (c) Reversible 1D assembly can be observed in water again after being treated in acetone. (a, d, e) Similar reversible process in water and isopropanol. (a, f, g) Irreversible assembly of  $\beta$ -AG microrods in water and dichloroethane. (f) 1D structures of  $\beta$ -AG microrods disassembly in dichloroethane. (g) No 1D assembly can be observed in water again after being treated in dichloroethane. (a, h, i) Similar irreversible process in water and petroleum ether.

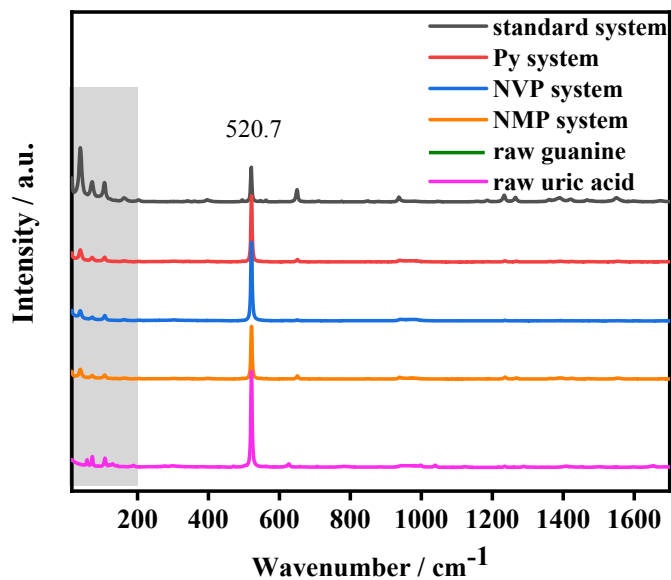

Fig. S5 Raman spectra of the guanine microrods prepared in four systems: Standard system (black curve), Py system (red curve), NVP system (blue curve) and NMP system (orange curve), raw guanine (green curve) and raw uric acid (pink curve) Raman spectra with wavenumber ranging from 15 to 1700 cm<sup>-1</sup>.
